# Supplementary material for: Facile synthesis of cysteine–functionalized graphene quantum dots for a fluorescence probe for mercury ions
Source: Royal Society of Chemistry journal article supplement (doi:10.1039/c5ra18495a), 2015-01-01
Supplement: c5ra18495a1.pdf [file c5ra18495a1.pdf]

## Supporting Information

### **Facile synthesis of cysteine-functionalized graphene quantum dots for a fluorescence probe for mercury ions.**

Tran Van Tam, Soon Ho Hong\*, Won Mook Choi\*

*School of Chemical Engineering, University of Ulsan, 93 Daehak-ro Nam-gu, Ulsan 680-749,  
Republic of Korea.*

\* E-mail addresses: [shhong@ulsan.ac.kr](mailto:shhong@ulsan.ac.kr) (S.H. Hong), [wmchoi98@ulsan.ac.kr](mailto:wmchoi98@ulsan.ac.kr) (W. M. Choi)

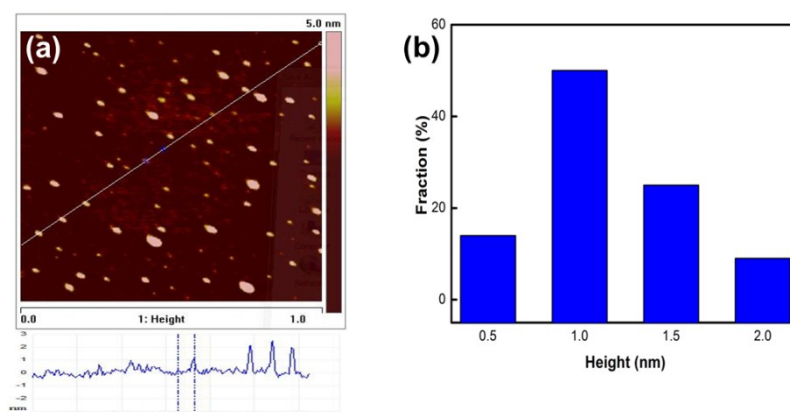

**Fig. S1** (a) AFM image and (b) the height distributions of cys-GQDs.

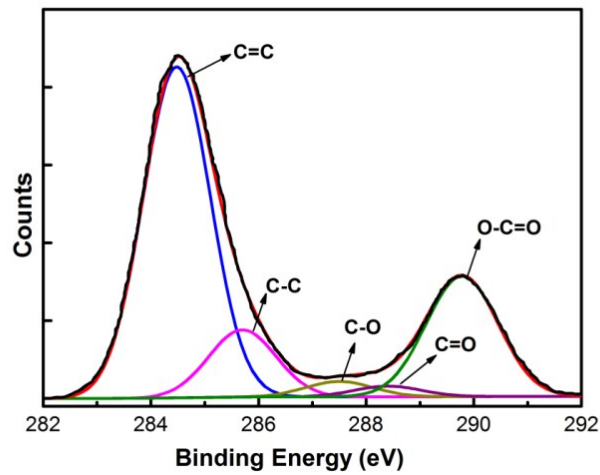

**Fig. S2** Core level C1s XPS spectrum of GQDs.

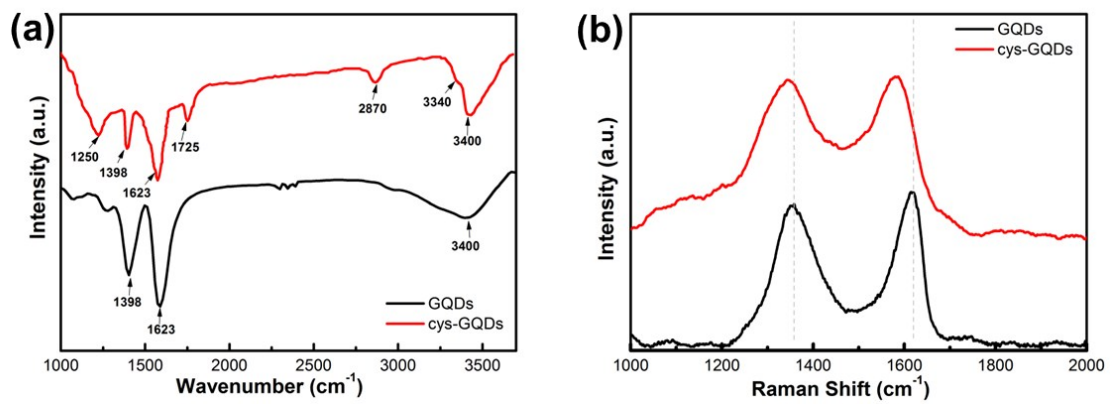

**Fig. S3** (a) FT-IR Spectroscopy and (b) Raman Spectroscopy of as-produced GQDs and cys-GQDs.

### The Quantum yield of cys-GQDs

The quantum yield (Q) of GQDs and cys-GQDs were calculated using following equation. Quinine sulfate in 0.5 M H<sub>2</sub>SO<sub>4</sub> was a reference fluorophore of known quantum yield (Q= 0.54 at 340 nm). I is the measured integrated emission intensity, n is the refractive index of solvent, and A is the absorption at 340nm. The concentration of GQDs, cys-GQDs and quinine sulfate are the same at 0.003 mg/ml. Excitation wavelengths was 365 nm.

$$Q = Q_A \frac{I A_R n^2}{I_R A n_R^2}$$

**Table S1.** The quantum yield of GQDs and cys-GQDs

| Sample             | Emission intensity (I) | Absorption (A) | Refractive index (n) | Quantum yield (Q) |
|--------------------|------------------------|----------------|----------------------|-------------------|
| Quinine sulfate    | 30110                  | 1.5906         | 1.33                 | 0.54              |
| cys-GQDs (0.8 wt%) | 6073                   | 0.62515        | 1.33                 | 0.28              |
| GQDs               | 4523                   | 1.4675         | 1.33                 | 0.088             |

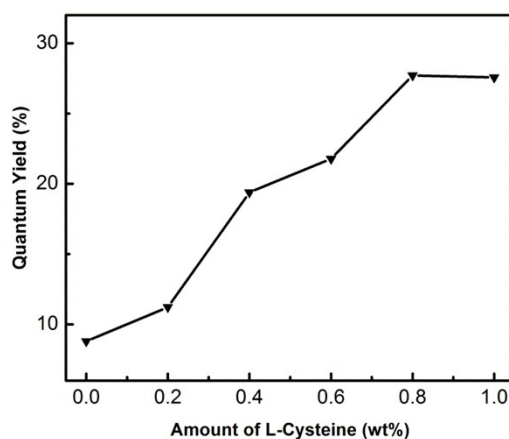

**Fig. S4** Quantum yield of as-prepared cys-GQDs with different amount of L-cysteine.

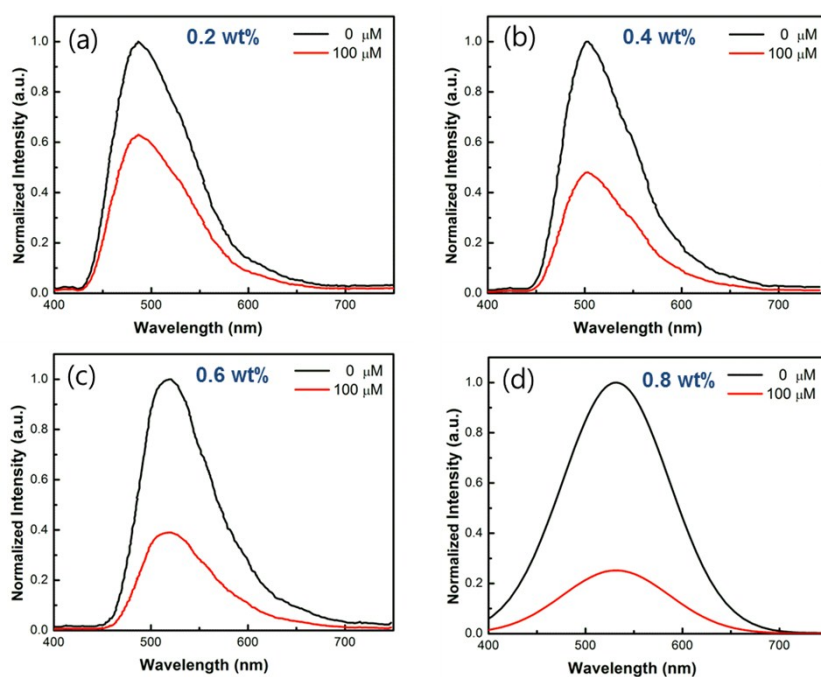

**Fig. S5** Fluorescence intensity changes of cys-GQDs with different amount of L-Cysteine (0.2, 0.4, 0.6, 0.8 wt%) in the presence of 100 μM of Hg<sup>2+</sup>, respectively.

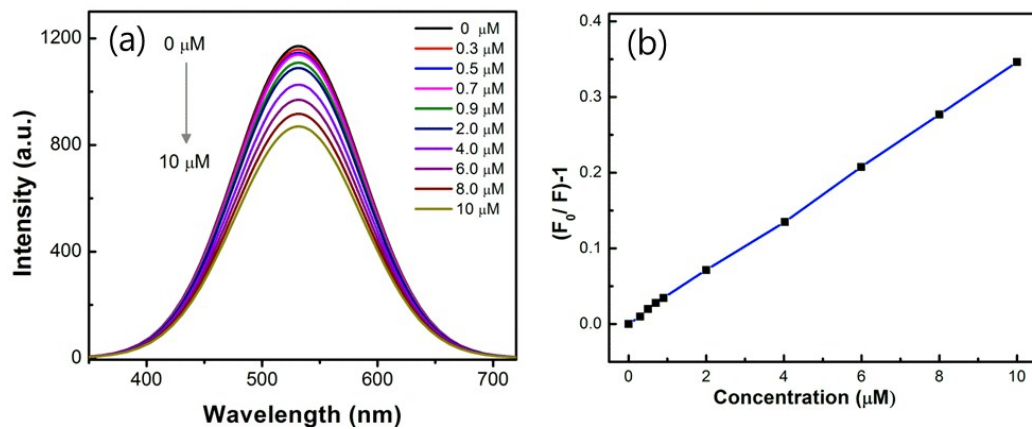

**Fig. S6** (a) Fluorescence spectra of cys-GQDs in the river water upon various concentrations of  $Hg^{2+}$  and (b) the linear relationship between the fluorescence quenching efficiency and  $Hg^{2+}$  concentration.
